# Supplementary material
Source: publisher figshare collection journal article supplement (https://frontiersin.figshare.com/ndownloader/files/14461889)
Supplement: Supplementary file [file 14461889]

## *Supplementary Material*

### ***Bacillus subtilis* spore resistance to simulated Mars surface conditions**

**Marta Cortesão<sup>1</sup>, Felix M. Fuchs<sup>1</sup>, Fabian M. Commichau<sup>2</sup>, Patrick Eichenberger<sup>3</sup>, Andrew C. Schuerger<sup>4</sup>, Wayne L. Nicholson<sup>5</sup>, Peter Setlow<sup>6</sup>, and Ralf Moeller<sup>1,\*</sup>**

**\* Correspondence:** German Aerospace Center (DLR e.V.), Institute of Aerospace Medicine, Radiation Biology Department, Space Microbiology Research Group, Linder Höhe, D-51147 Cologne (Köln), Germany, Phone +49(2203) 601-3145, Fax +49(2203) 61790, E-mail: ralf.moeller@dlr.de

#### **1 Supplementary Figures**

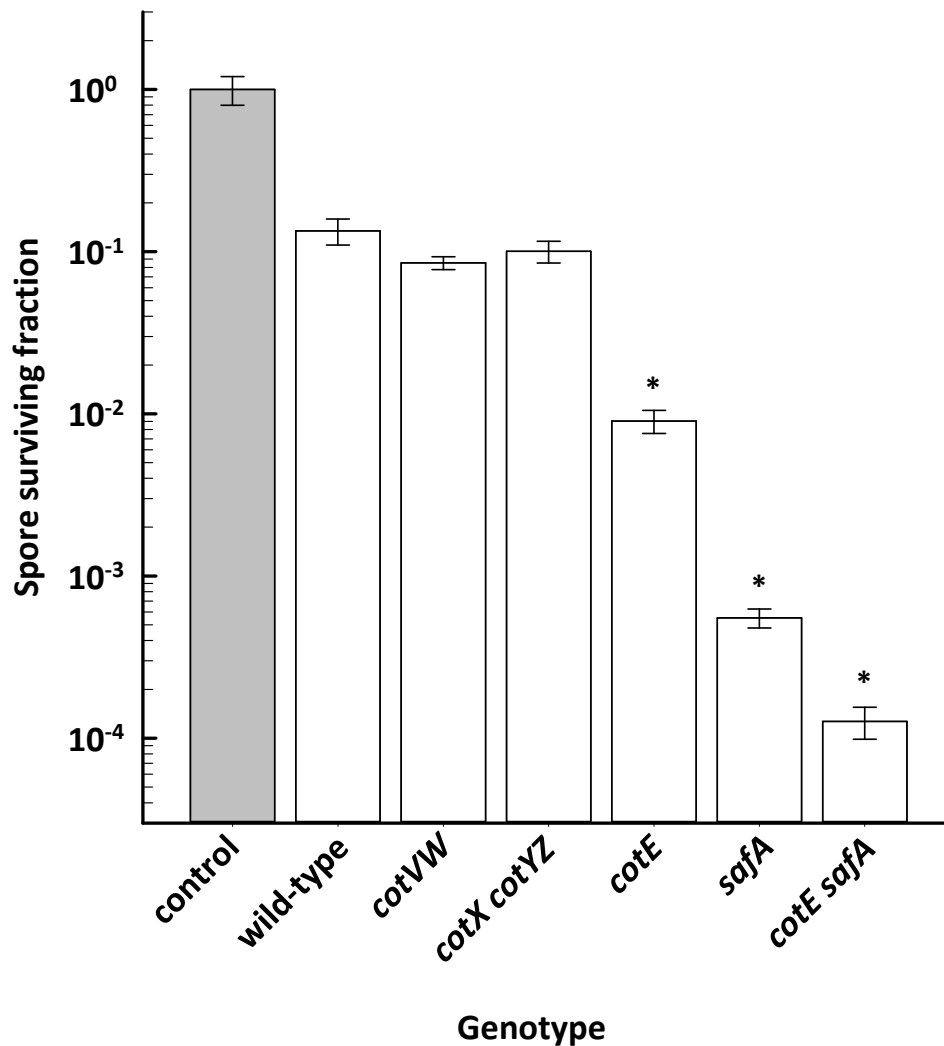

**Supplementary Figure S01.** Survival of *B. subtilis* coat-defective spores exposed to M(+)UV. Spores were exposed to M(+)UV and spore viability was determined as described in Methods. The genotypes tested are indicated below the bars; the wild-type strain is PY79. The control spores of each strain were air-dried spore multilayers exposed for 24 h to ambient laboratory conditions, and all control spore surviving fractions were set at 100%. Data are expressed as averages and standard deviations ( $n = 3$ ). (\*) Statistically significant difference from values for wild-type spores ( $P \leq 0.05$ ).

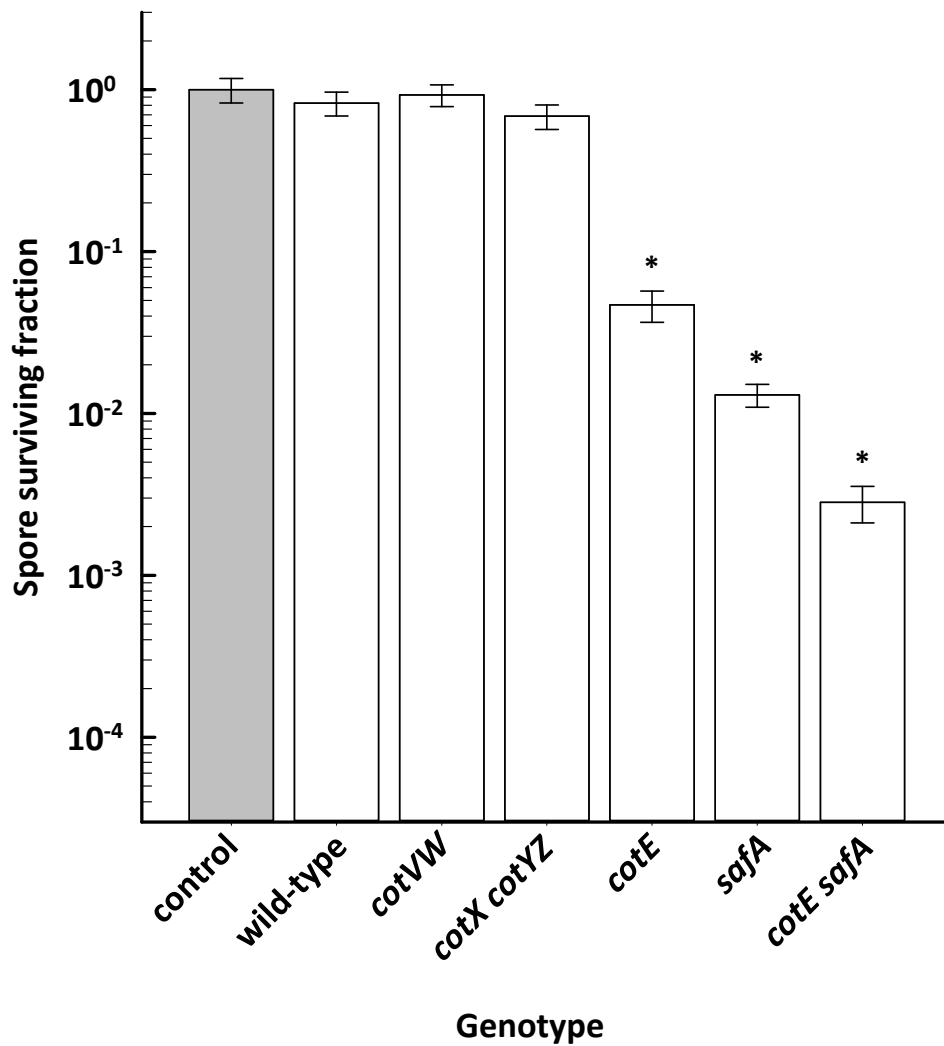

**Supplementary Figure S02.** Survival of *B. subtilis* coat-defective spores exposed to M(-)UV. Spores were exposed to M(-)UV and spore viability was determined as described in Methods. The genotypes tested are indicated below the bars; the wild-type strain is PY79. The control spores of each strain were air-dried spore multilayers exposed for 24 h to ambient laboratory conditions, and all control spore surviving fractions were set at 100%. Data are expressed as averages and standard deviations ( $n = 3$ ). (\*) Statistically significant difference from values for wild-type spores ( $P \leq 0.05$ ).

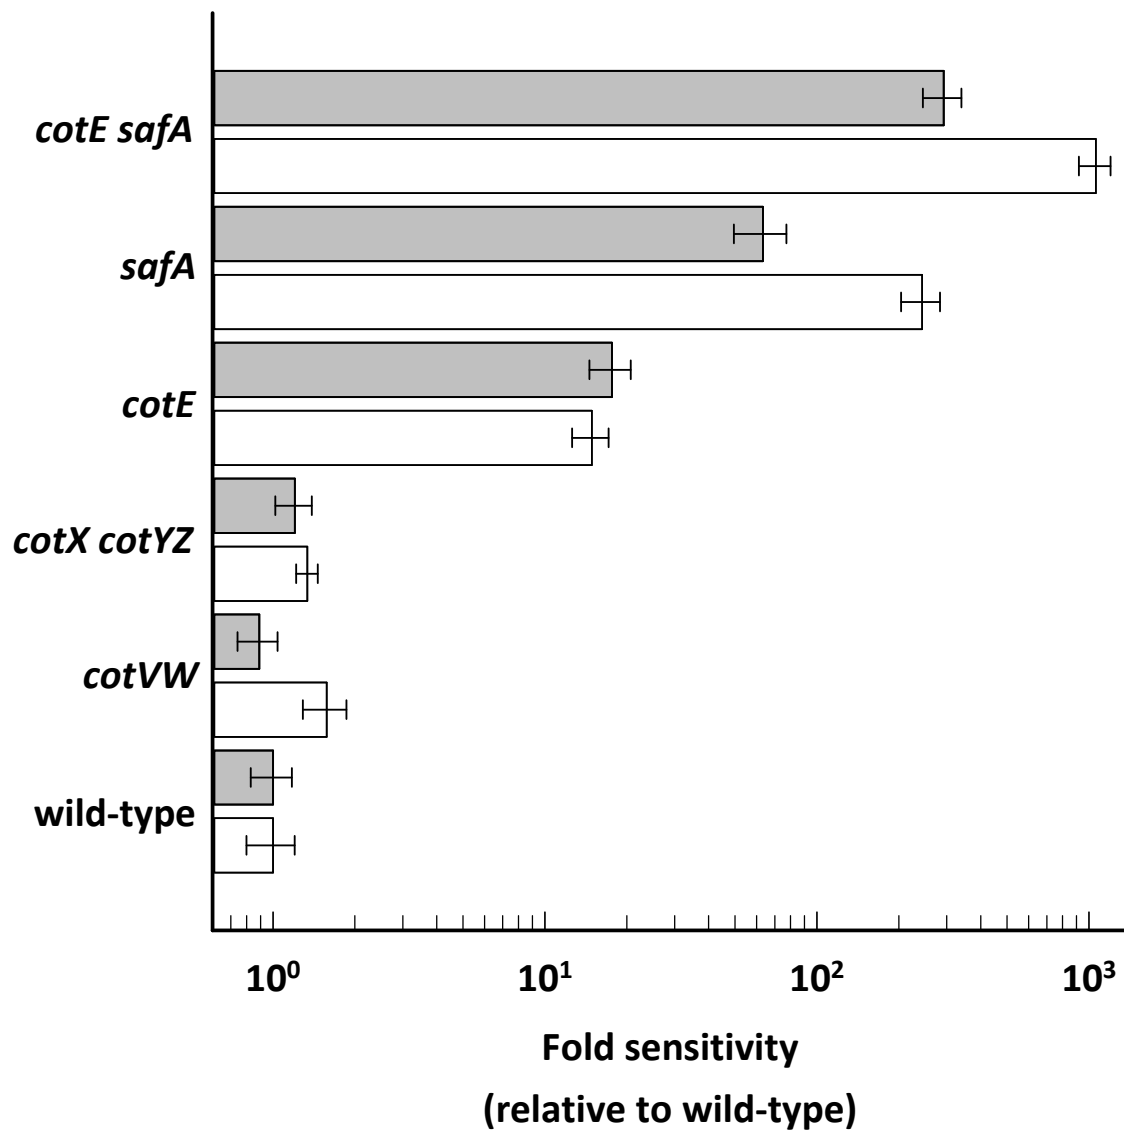

**Supplementary Figure S03.** Cortesão et al. Impact of coat defects on relative sensitivities of spores to M(+)UV (grey) and M(-)UV (white). Relative spore sensitivity was expressed as the ratio of the survival of wild-type spores to that of mutant spores using data from Figure S01 and S02. Data are averages and standard deviations (n = 3). The actual data are shown above the corresponding columns in Table 4.



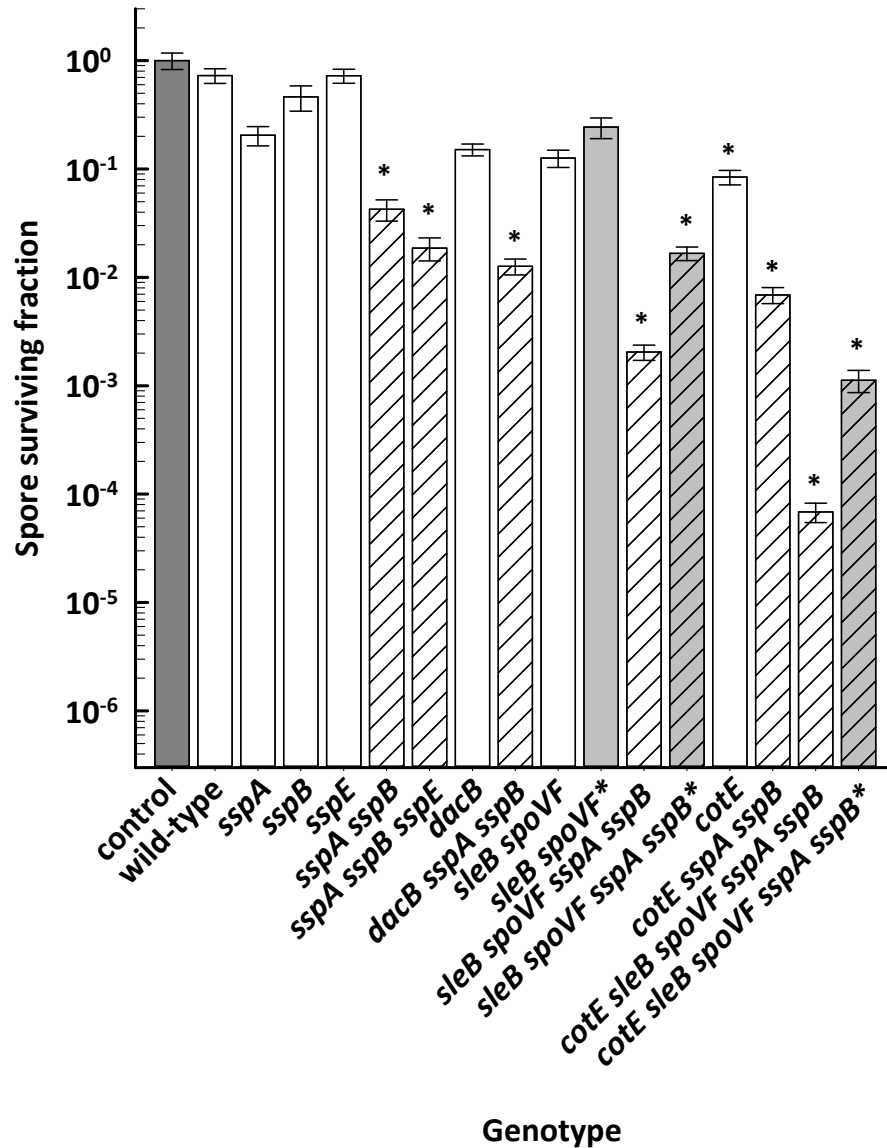

**Supplementary Figure S05.** Cortesão et al. Survival of *B. subtilis* spores lacking protective components exposed to M(-)UV. Spores were exposed to M(-)UV and spore viability was determined as described in Methods. The strains used are indicated below the bars (Table 1); the wild-type strain is PS832. The control spores of each strain were air-dried spore multilayers exposed for 24 h to ambient laboratory conditions, and all control spore surviving fractions were set at 100%. Data are expressed as averages and standard deviations ( $n = 3$ ). Dashed bars represent mutants with  $\alpha$ - and  $\beta$ -type SASP deficiency. In (light) grey: 100  $\mu\text{M}$   $\text{Ca}^{2+}$  and DPA added during sporulation. (\*) Statistically significant difference from values for wild-type spores ( $P \leq 0.05$ ).

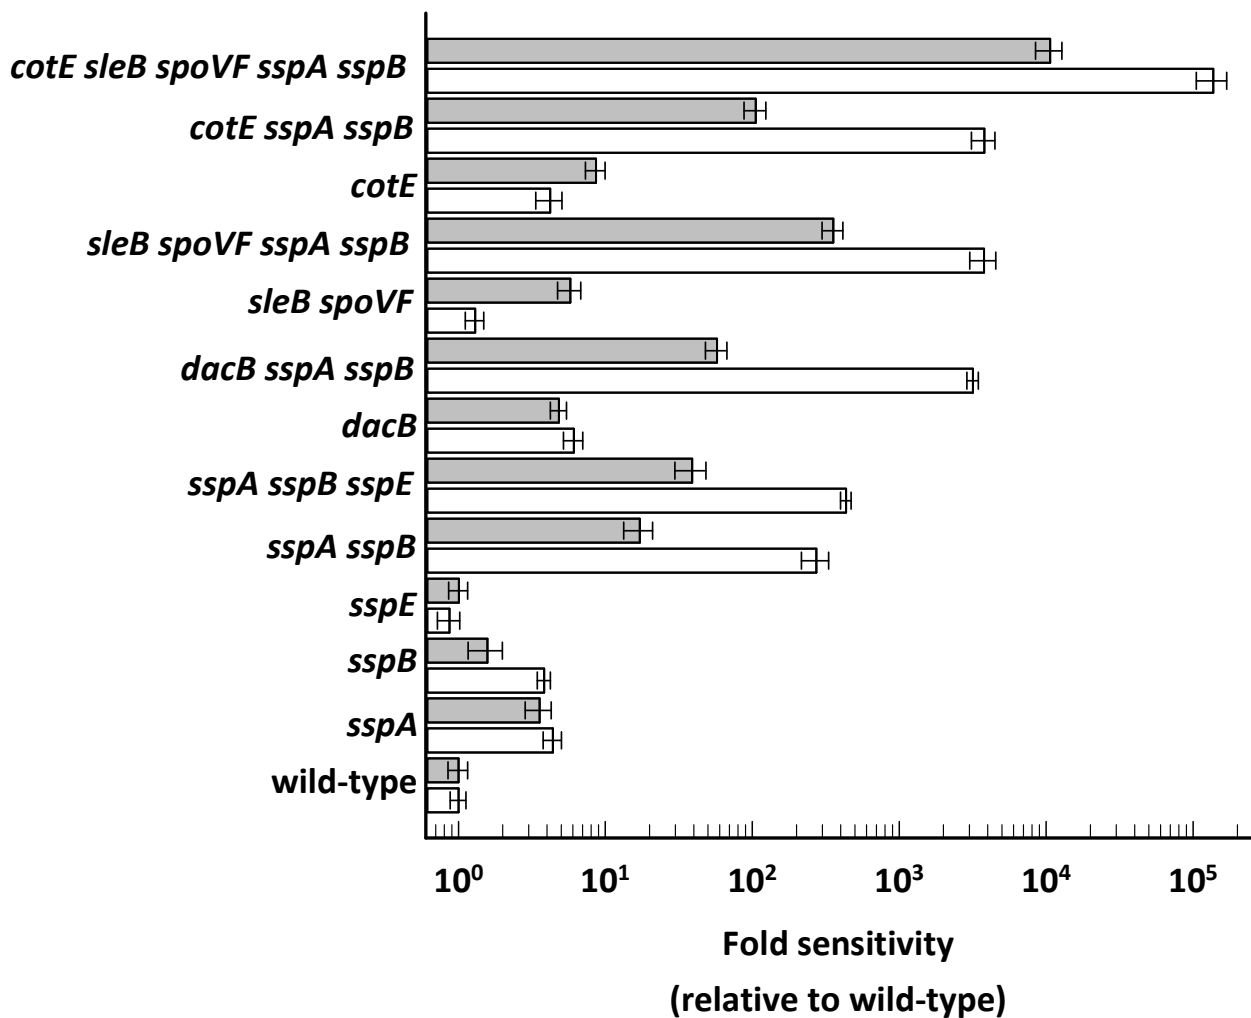

**Supplementary Figure S06.** Cortesão et al. Impacts of loss of various spore protective factors on relative sensitivities of spores to M(+)UV (grey) and M(-)UV (white). Relative spore sensitivity was expressed as the ratio of the survival of wild-type spores to that of mutant spores using data from Figure S04 and S05. Data are averages and standard deviations (n = 3). The actual data are shown above the corresponding columns in Table 4.

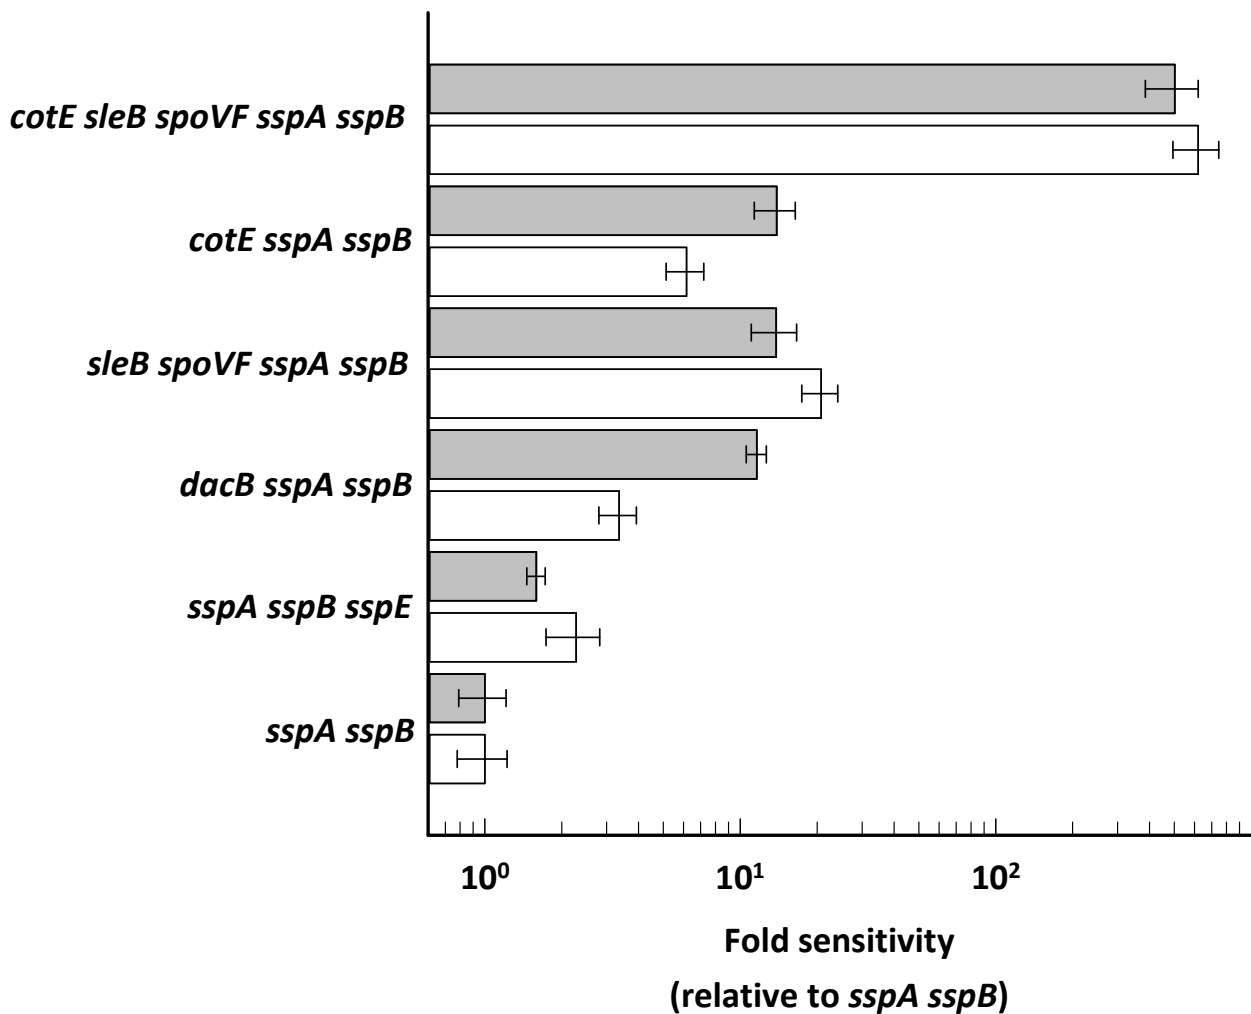

**Supplementary Figure S7.** Cortesão et al. Impacts of loss of *sspA sspB* genes on relative sensitivities of other mutant spores to M(+)UV (grey) and M(-)UV (white). Relative spore sensitivity was expressed as the ratio of the survival of *sspA sspB* individual mutant spores to that of spores with additional mutations using data from Figure S04 and S05. Data are averages and standard deviations ( $n = 3$ ). The actual data are shown above the corresponding columns in Table 4.



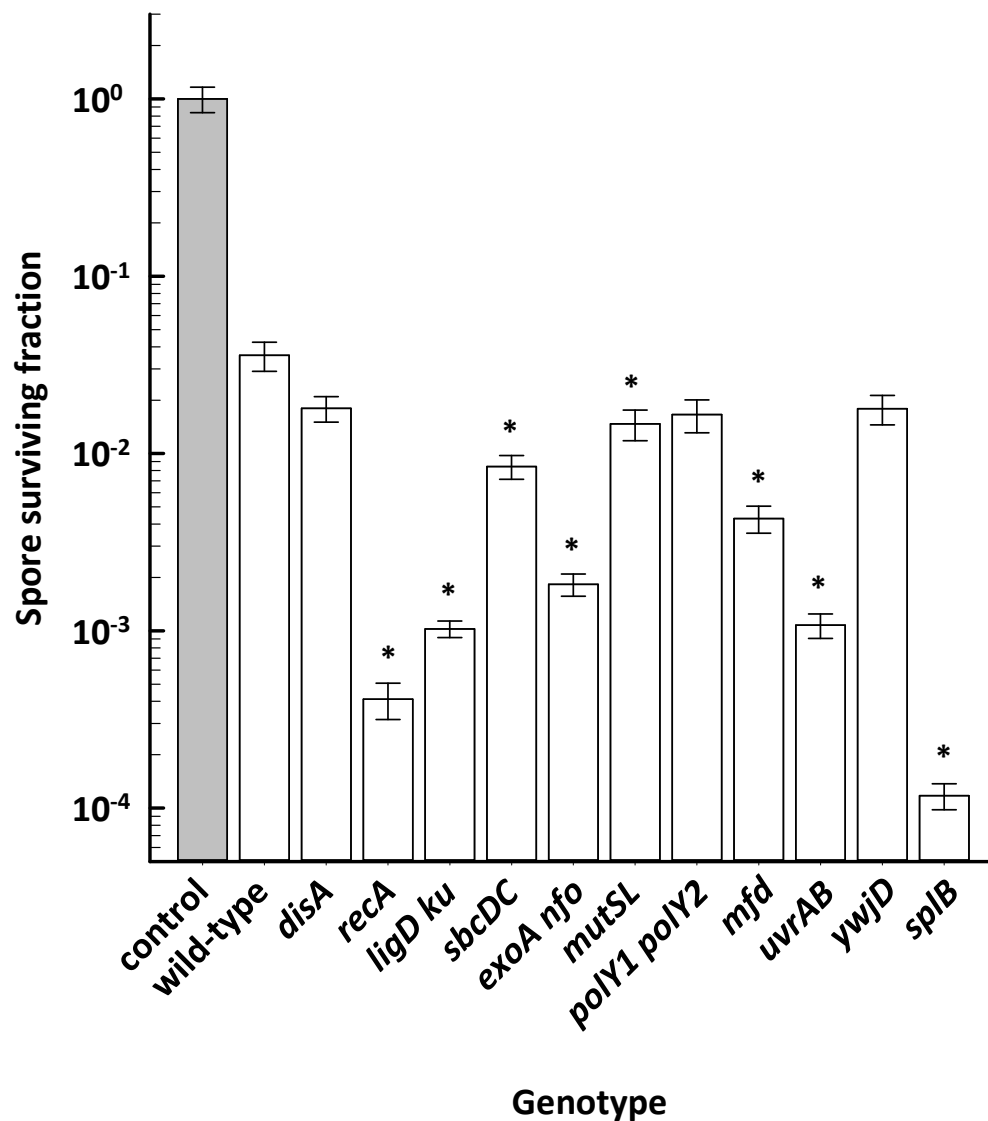

**Supplementary Figure S08.** Cortesão et al. Survival of *B. subtilis* spores lacking various DNA repair genes exposed to M(+)UV. Spores were exposed to M(+)UV and spore viability was determined as described in Methods. The strains used are indicated below the bars (Table 2); the wild-type strain is 168. The control spores of each strain were air-dried spore multilayers exposed for 24 h to ambient laboratory conditions, and all control spore surviving fractions were set at 100%. Data are expressed as averages and standard deviations (n = 3). (\*) Statistically significant difference from values for wild-type spores ( $P \leq 0.05$ ).

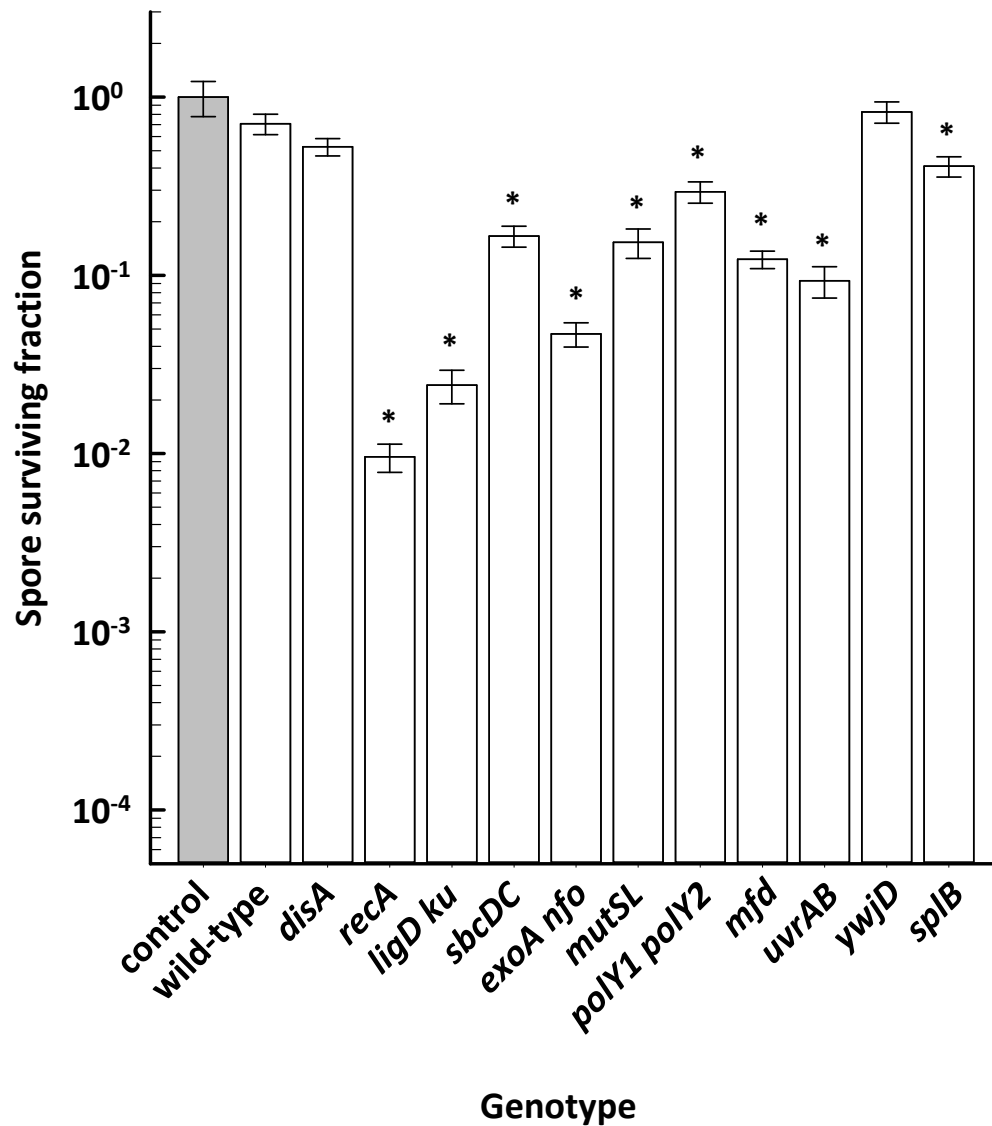

**Supplementary Figure S09.** Cortesão et al. Survival of *B. subtilis* spores lacking various DNA repair genes exposed to M(-)UV. Spores were exposed to M(-)UV and spore viability was determined as described in Methods. The strains used are indicated below the bars (Table 2); the wild-type strain is 168. The control spores of each strain were air-dried spore multilayers exposed for 24 h to ambient laboratory conditions, and all control spore surviving fractions were set at 100%. Data are expressed as averages and standard deviations ( $n = 3$ ). (\*) Statistically significant difference from values for wild-type spores ( $P \leq 0.05$ ).

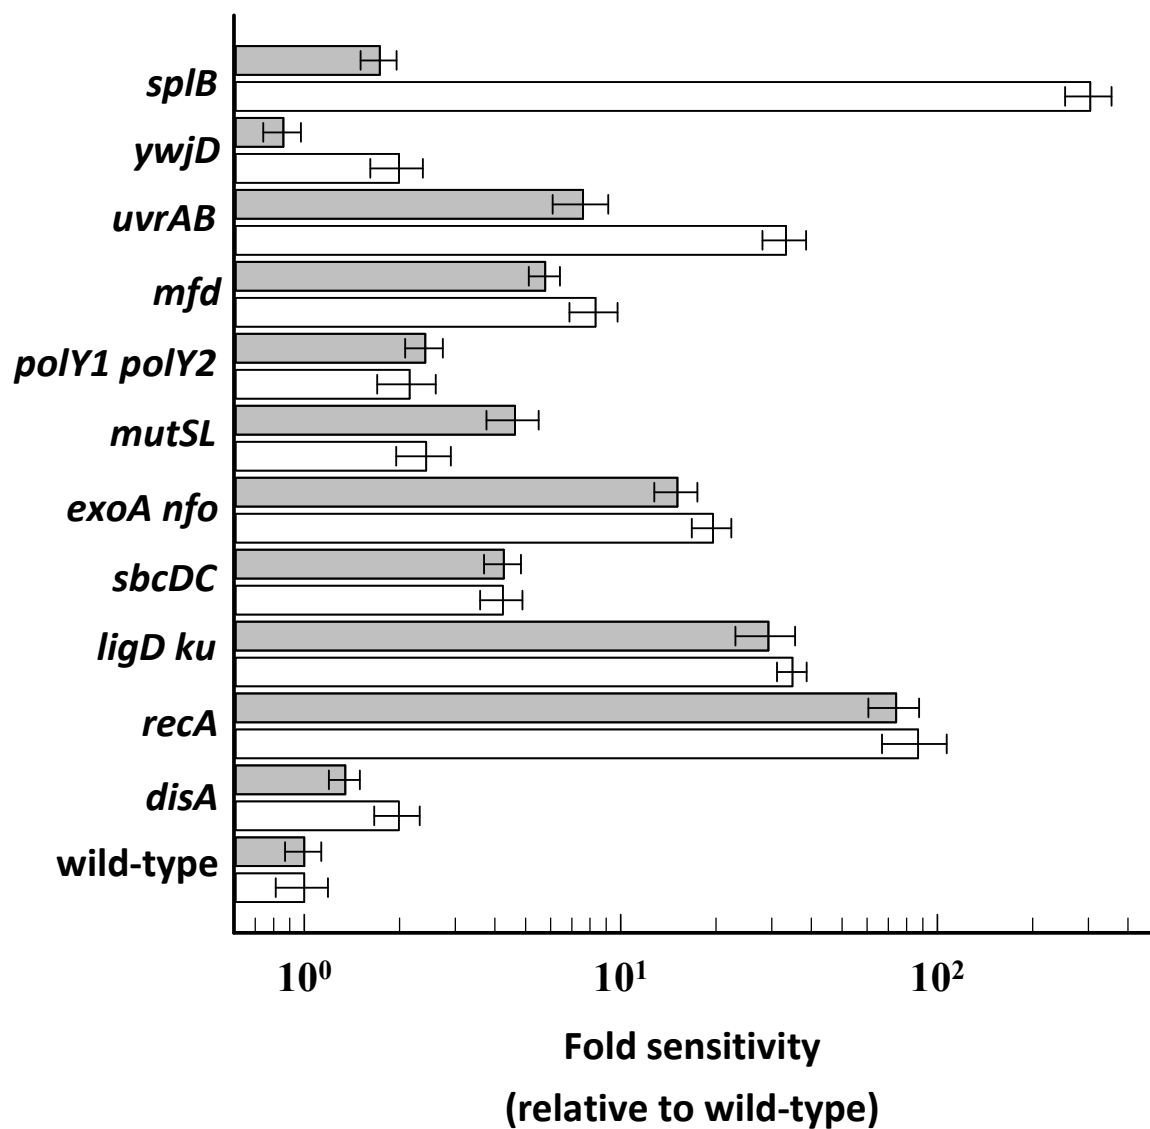

**Supplementary Figure S10.** Cortesão et al. Impact of loss of various DNA repair genes on relative sensitivities of spores to M(+)-UV (grey) and M(-)-UV (white). Relative spore sensitivity was expressed as the ratio of the survival of wild-type spores (the wild-type strain is 168) to that of mutant spores using data from Figure S08 and S09. Data are averages and standard deviations (n = 3). The actual data are shown above the corresponding columns in Table 5.

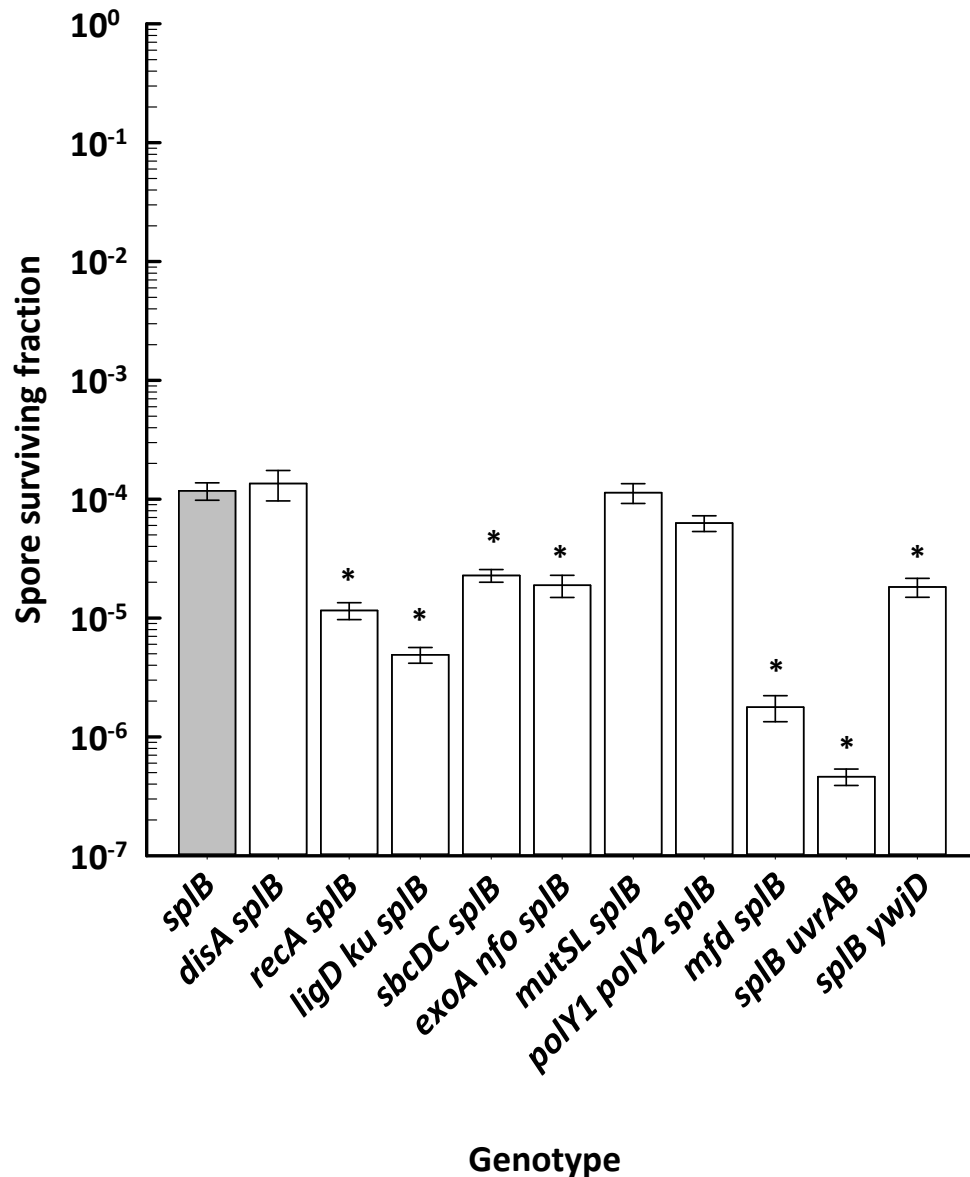

**Supplementary Figure S11.** Cortesão et al. Survival of *B. subtilis* spores lacking the *splB* gene together with other DNA repair genes exposed to M(+)UV. Spores were exposed to M(+)UV and spore viability was expressed relative to that of the *splB* strain and was determined as described in Methods. The strains used are indicated below the bars. The control spores of each strain were air-dried spore multilayers exposed for 24 h to ambient laboratory conditions, and all control spore surviving fractions were set at 100%. Data are expressed as averages and standard deviations ( $n = 3$ ). (\*) Statistically significant difference from values for wild-type spores ( $P \leq 0.05$ ).

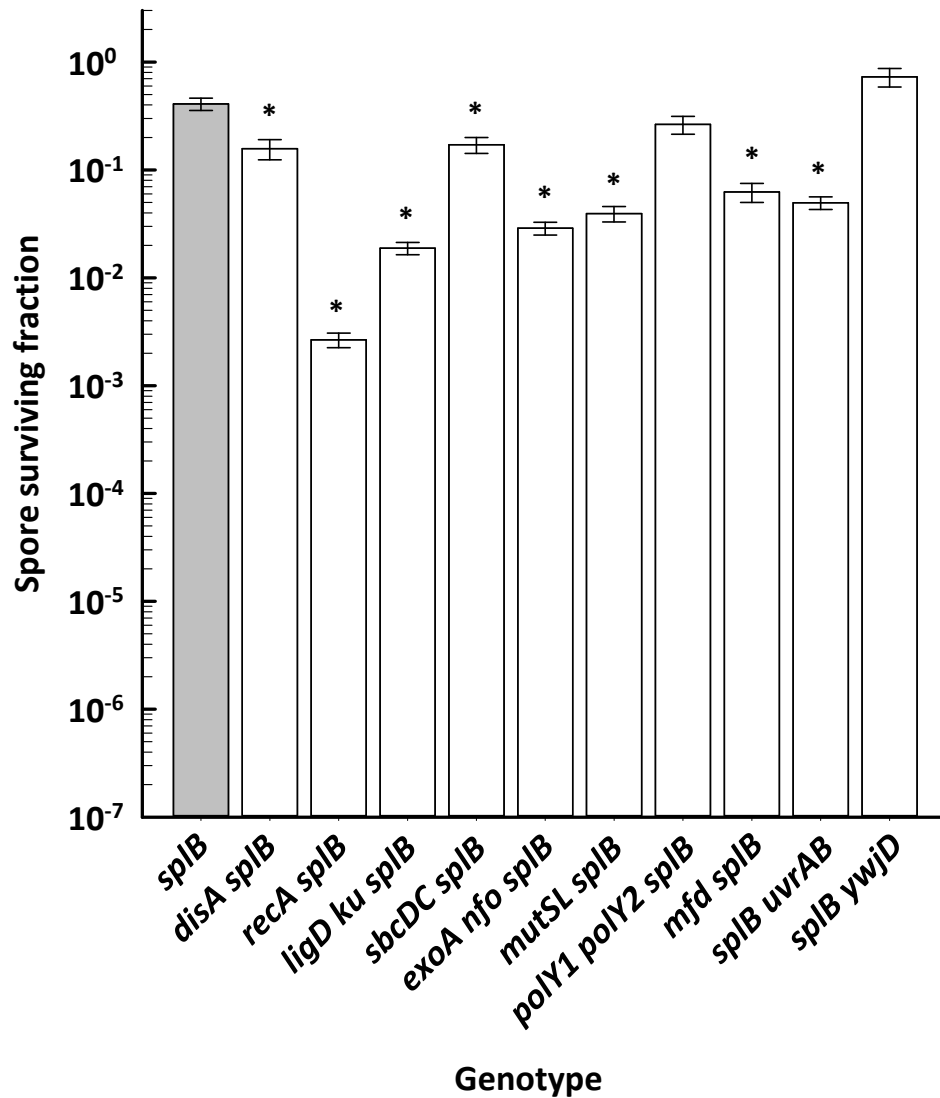

**Supplementary Figure S12.** Cortesão et al. Survival of *B. subtilis* spores lacking the *splB* gene together with other DNA repair genes exposed to M(+)UV. Spores were exposed to M(+)UV and spore viability was expressed relative to that of the *splB* strain and was determined as described in Methods. The strains used are indicated below the bars. The control spores of each strain were air-dried spore multilayers exposed for 24 h to ambient laboratory conditions, and all control spore surviving fractions were set at 100%. Data are expressed as averages and standard deviations (n = 3). (\*) Statistically significant difference from values for wild-type spores ( $P \leq 0.05$ ).

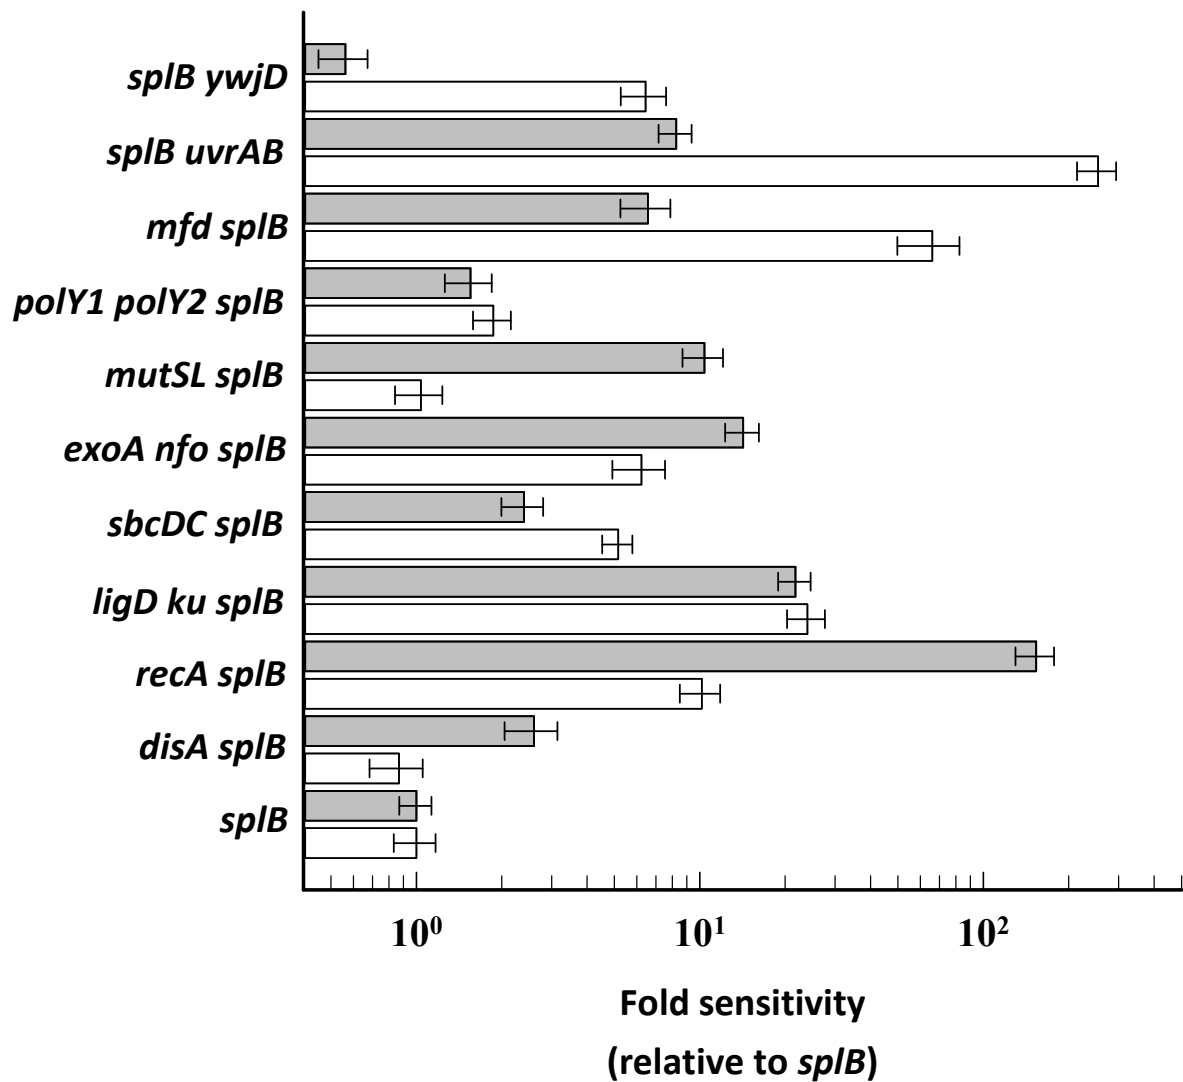

**Supplementary Figure S13.** Cortesão et al. Impact of loss of the *splB* gene on relative sensitivities of other mutant spores to M(+)-UV (grey) and M(-)-UV (white). Relative spore sensitivity was expressed as the ratio of the survival of *splB* spores to that of double mutant spores using data from Figure S11 and S12. Data are averages and standard deviations ( $n = 3$ ). The actual data are shown above the corresponding columns in Table 5.
